# Supplementary material for: Epigallocatechin Gallate (EGCG) Promotes the Immune Function of Ileum in High Fat Diet Fed Mice by Regulating Gut Microbiome Profiling and Immunoglobulin Production
Source: Front Nutr. 2021 Sep 20;8:720439. doi: 10.3389/fnut.2021.720439 (PMC8488439; doi:10.3389/fnut.2021.720439)
Supplement: Supplementary file 2 [file Data_Sheet_2.xlsx]

## Sheet: DE genes1
Gene_id	Gene name	FC(HFD/Chow)	Padjust	TPM
				Chow_1	Chow_2	Chow_3	Chow_4	HFD_1	HFD_2	HFD_3	HFD_4
ENSMUSG00000046688	Tifa	0.284	3.3507e-12	43.24	25.04	43.11	62.27	16.61	17.65	11.33	16.17
ENSMUSG00000030017	Reg3g	0.24	3.56396e-11	2794.46	3285.64	6398.85	5459.25	1029.62	1596.64	777.12	2055.65
ENSMUSG00000030882	Dnhd1	3.557	1.53922e-10	0.92	0.47	0.87	0.76	1.95	1.9	1.09	2.56
ENSMUSG00000079180	Mptx2	0.23	3.39511e-10	960.77	1365.07	843.61	1252.18	451.33	250.09	341.14	232.27
ENSMUSG00000071637	Cebpd	0.464	7.01568e-10	7.65	6.82	8.14	7.6	3.94	5.87	4.84	4.33
ENSMUSG00000020889	Nr1d1	2.342	9.86923e-09	3.77	2.88	4.26	3.89	9.55	9.07	9.36	13.74
ENSMUSG00000063206	Defa34	0.38	9.86923e-09	415.8	479.3	479.54	500.86	298.72	186.37	180.27	206.73
ENSMUSG00000071356	Reg3b	0.278	1.01272e-08	7699.14	11765.5	15515.2	17844.1	3349.85	6374.22	2745.46	6350.24
ENSMUSG00000028088	Fmo5	2.119	6.55154e-08	35.59	31.03	33.41	25.96	73.19	108.29	67.21	94.22
ENSMUSG00000076501	Igkv2-137	3.972	6.55154e-08	11.43	9.72	14.02	6.86	39.15	38.43	70	55.21
ENSMUSG00000050201	Otop2	12.071	6.55154e-08	0.19	0.1	0.05	0.02	1.67	1.55	1.65	0.8
ENSMUSG00000067786	Nnat	3.532	8.49572e-08	4.35	4.7	7.18	4.6	13.75	29.21	15.57	38.36
ENSMUSG00000041193	Pla2g5	0.206	9.224e-08	8.8	4.14	9.36	8.2	1.52	1.32	2.55	2.44
ENSMUSG00000053113	Socs3	0.319	1.44019e-07	37.13	14.07	41.38	27.92	9.91	11.36	13.13	12.7
ENSMUSG00000009185	Ccl8	0.198	2.76695e-07	38.7	9.97	38.08	37.42	7.07	4.73	7.26	10.82
ENSMUSG00000027187	Cat	2.353	5.28505e-07	46.57	46.03	37.19	54.25	112.52	175.75	98.26	175.83
ENSMUSG00000032726	Bmp8a	2.552	1.41547e-06	0.77	1.28	1.09	1.25	3.01	4.32	3.1	3.85
ENSMUSG00000061845	Defa35	0.362	2.45301e-06	341.74	419.08	375.96	458.18	254.44	129.46	172.08	147.02
ENSMUSG00000054385	Ceacam2	0.391	3.47897e-06	33.07	52.4	59.55	53.43	27.77	32.32	18.89	18.9
ENSMUSG00000072620	Slfn2	0.417	3.77207e-06	23.33	17.87	38.62	24.32	16.53	10.37	12.17	14.37
ENSMUSG00000097804	Gm16685	0.153	4.64505e-06	0.98	1.49	1.24	0.83	0.2	0.21	0.12	0.39
ENSMUSG00000026185	Igfbp5	2.002	5.14938e-06	4.29	2.59	4.2	3.14	8.05	10.63	6.44	10.61
ENSMUSG00000035186	Ubd	0.031	5.16646e-06	274.02	15.46	549.12	109.9	5.74	6.42	7.56	15.78
ENSMUSG00000050097	Ces2b	4.851	5.17108e-06	0.56	1.82	0.8	2	7.39	13.78	5.06	7.28
ENSMUSG00000048440	Cyp4f16	2.125	6.95304e-06	74.45	62.36	97.26	52.68	165.04	237.14	139.56	220.71
ENSMUSG00000050762	Prss27	0.291	7.87367e-06	7.68	2.58	10.83	6.59	2.76	2.69	2.04	2.23
ENSMUSG00000031762	Mt2	0.364	8.46299e-06	195.29	97.8	216.79	284.58	61.15	90.4	92.73	109.22
ENSMUSG00000041577	Prelp	2.343	9.46578e-06	4.38	2.44	4.74	3.27	8.53	13.47	7.39	15.18
ENSMUSG00000046082	Tmem174	9.061	9.46578e-06	0.12	0.11	0	0.1	0.88	1.42	0.45	1.42
ENSMUSG00000004105	Angptl2	2.035	9.46578e-06	3.13	2.69	2.55	3.42	5.77	8.78	6.42	9.14
ENSMUSG00000035486	Plk5	4.216	1.11415e-05	0.6	0.4	0.18	0.35	2.35	3.26	1.4	2.34
ENSMUSG00000023064	Sncg	2.853	1.12057e-05	10.75	11.51	8.38	12.11	22.61	48.07	28.8	59.75
ENSMUSG00000032373	Car12	2.841	1.14336e-05	2.49	3.72	3.15	4.47	10.05	19.99	7.05	13.19
ENSMUSG00000081406	Rps6-ps4	0.347	2.02588e-05	269.09	246.83	151.86	163.22	89.43	107.35	103.55	64.3
ENSMUSG00000059201	Lep	4.058	2.02588e-05	0.44	0.24	0.25	0.15	0.87	1.94	1.12	1.75
ENSMUSG00000026149	Tm4sf20	0.443	2.06922e-05	197.01	279.98	190.68	309.83	127.91	152.2	143.08	160.13
ENSMUSG00000022445	Cyp2d26	3.095	2.53769e-05	54.49	33.67	16.64	31.31	135.36	141.77	140.57	135
ENSMUSG00000064358	mt-Co3	0.5	2.64264e-05	802.24	791.42	976.92	695.07	625.05	593.18	330.01	522.26
ENSMUSG00000028749	Pla2g2f	0.478	2.70165e-05	10.88	7.48	9.32	9.97	6.62	5.4	5.78	4.62
ENSMUSG00000037145	2210407C18Rik	0.274	3.05362e-05	36.89	17.04	92.71	36.24	12.82	15.6	16.54	14.14
ENSMUSG00000068349	Gml	0.173	3.05362e-05	1.55	3.66	5.08	6.88	0.45	1.73	0.73	0.83
ENSMUSG00000022650	Retnlb	0.069	3.05362e-05	0.59	4.18	9.28	11.68	1.26	0.34	0.2	0.34
ENSMUSG00000096020	Ighv1-75	3.115	3.2378e-05	8.52	5.01	15.91	12.16	32.84	37.7	35.13	49.18
ENSMUSG00000023132	Gzma	0.397	3.33763e-05	81.03	81.48	149.4	97.05	36.4	35.78	50.11	80.6
ENSMUSG00000079419	Ms4a6c	0.47	3.71369e-05	6.93	7.92	9.44	11.19	5.18	4.25	6.32	5.82
ENSMUSG00000037628	Cdkn3	0.477	3.78032e-05	14.84	13.21	13.63	14.43	9.15	8.07	8.7	6.83
ENSMUSG00000037661	Gpr160	0.461	5.17938e-05	46.63	17.52	44.61	35.48	19.56	22.92	21.06	22.45
ENSMUSG00000019122	Ccl9	0.423	5.39009e-05	12.33	12.45	23.56	14.22	8.45	7.19	11.94	10.78
ENSMUSG00000024338	Psmb8	0.3	6.14622e-05	411.42	90.17	517.44	221.53	106.79	99.29	103.09	144.42
ENSMUSG00000058908	Pla2g2a	0.477	7.05981e-05	71.48	42.04	75.99	59.02	38.46	40.79	35.86	28.65
ENSMUSG00000019326	Aoc3	2.453	7.05981e-05	2.47	1.67	2.2	2.04	3.97	8.32	4.27	10.12
ENSMUSG00000028339	Col15a1	2.051	7.53139e-05	3.04	2.3	2.61	3.75	4.58	7.19	3.67	6.17
ENSMUSG00000094694	Ighv1-9	3.112	8.50826e-05	34.11	11.11	27.92	25.38	99.07	131.79	54.08	87.89
ENSMUSG00000034855	Cxcl10	0.316	0.000122068	13.58	7.56	19.74	7.17	4.21	4.52	2.81	6.74
ENSMUSG00000030188	Magohb	0.497	0.000137705	18.09	15.49	19.39	15.18	9.43	11.61	12.49	9.33
ENSMUSG00000038301	Snx10	0.495	0.000141783	6.77	3.52	6.66	6.89	4.09	3.24	3.35	3.51
ENSMUSG00000031628	Casp3	0.336	0.000142074	37.31	9.76	47.12	22.04	13.17	12.15	8.98	14.26
ENSMUSG00000044338	Aplnr	2.302	0.000160297	0.78	0.56	0.86	0.51	1.56	2.32	1.43	2.65
ENSMUSG00000110634	Gm45895	0.318	0.000160297	19.54	10.29	16.77	5.13	5.61	5.8	5.03	4.07
ENSMUSG00000097673	Gm26608	0.454	0.000166694	3.34	2.13	4.85	4.68	2.58	1.93	1.86	2.22
ENSMUSG00000020473	Aebp1	2.036	0.000175556	2.54	2.58	2.57	3.16	5.13	7.59	5.5	9.37
ENSMUSG00000054072	Iigp1	0.037	0.00017878	60.23	2.52	50.13	13.86	2.86	2.04	2.29	3.64
ENSMUSG00000026726	Cubn	2.94	0.00017878	20.27	32.42	11.85	27.28	60.99	114.66	44.09	89.83
ENSMUSG00000016496	Cd274	0.286	0.00017878	11.09	2.15	12.49	5.15	2.58	2.3	2.36	3.53
ENSMUSG00000051832	E230016K23Rik	0.388	0.000180039	16.1	17.49	13.59	18.74	10.31	5.37	8.43	8.43
ENSMUSG00000015709	Arnt2	2.063	0.000184445	0.39	0.47	0.39	0.57	1.02	1.17	1.15	1.34
ENSMUSG00000022098	Bmp1	2.19	0.000186384	5.78	7.36	4.98	9.03	19.55	25.2	12.65	21.08
ENSMUSG00000009614	Sardh	2.432	0.000190212	1.05	1.59	1.64	1.44	4.25	5.87	2.33	5.76
ENSMUSG00000025243	Slc6a20b	3.517	0.000190212	0.22	0.5	0.38	0.72	1.62	4.17	1.12	2.61
ENSMUSG00000095130	Ighv1-39	3.694	0.000190212	7.75	4.55	17.99	14.21	35.73	35.1	44.72	81.91
ENSMUSG00000030546	Plin1	3.349	0.000206386	1.34	1.88	1.68	2.43	3.1	8.21	4.35	16.13
ENSMUSG00000079197	Psme2	0.494	0.000206435	601.11	298.3	680.78	431.79	310.33	274.58	271.69	276.69
ENSMUSG00000028635	Edn2	2.125	0.00022165	7.37	12.78	10.59	9.25	31.1	28.29	21.14	29.15
ENSMUSG00000040026	Saa3	0.233	0.000254178	4.11	6.92	15.52	13.01	4.35	2.27	1.78	2.89
ENSMUSG00000049605	Olfr418	0.209	0.000277269	0.25	0.41	0.41	0.42	0.16	0.02	0.08	0.14
ENSMUSG00000063434	Sorcs3	6.764	0.000289086	0.02	0.03	0.06	0.07	0.34	0.48	0.11	0.5
ENSMUSG00000074639	Rdh16f2	4.147	0.0003076	1.39	3.65	0.77	1.06	12.19	8.46	7.99	9.57
ENSMUSG00000022651	Retnlg	0.158	0.0003076	2.75	7.13	4.04	6.9	1.69	0.15	1.33	0.92
ENSMUSG00000073555	Gm4951	0.211	0.0003076	2.38	0.37	1.24	1.53	0.2	0.32	0.58	0.3
ENSMUSG00000074345	Tnfaip8l3	0.458	0.000320226	4.35	1.77	4.63	3.04	1.84	1.93	1.73	2.34
ENSMUSG00000020829	Slc46a1	2.007	0.00032621	2.81	2.1	2.15	2.43	4.79	7.46	6.11	6.2
ENSMUSG00000034271	Jdp2	0.335	0.00032782	12.69	4.5	22.82	9.79	3.69	5.24	4.74	6.51
ENSMUSG00000026822	Lcn2	0.405	0.000335354	5.98	3.79	4.51	7.08	2.12	2.66	2.66	3.49
ENSMUSG00000018623	Mmp7	0.496	0.000335451	292.92	217.41	279.61	269.49	228.41	161.34	151.91	118.81
ENSMUSG00000022665	Ccdc80	2.497	0.000376466	2.12	1.94	1.65	2.12	3.49	8.56	3.91	11.82
ENSMUSG00000079339	Ifit1bl1	0.339	0.000440732	47.8	35.94	69.12	97.18	40.47	24.12	9.79	28.94
ENSMUSG00000078921	Tgtp2	0.141	0.00044972	57.33	5.7	47.8	19.61	5.58	5.64	4.17	6.75
ENSMUSG00000068606	Gm4841	0.049	0.000460457	6.16	0.09	6.49	1.66	0.07	0.13	0.1	0.07
ENSMUSG00000060639	Hist1h4i	0.494	0.000573684	16.08	12.55	16.28	14.2	8.21	7.59	11.12	9.1
ENSMUSG00000027514	Zbp1	0.133	0.000604558	140.7	17.68	188.32	111.16	25.64	11.47	13.36	18.51
ENSMUSG00000028415	Spink4	0.485	0.000604558	2349.34	3507.81	3184.28	2674.87	1925.65	1492.08	2058.17	1442.22
ENSMUSG00000012519	Mlkl	0.437	0.000604558	11.9	4.5	12.42	8.8	6.51	4.65	3.99	5.58
ENSMUSG00000020407	Upp1	0.138	0.000609072	895.54	118.57	1956.77	707.95	127.73	164.55	106.78	185.49
ENSMUSG00000015437	Gzmb	0.376	0.000640898	23.36	13.97	53.62	22.96	10.26	11.13	10.36	21.2
ENSMUSG00000086068	1700120G11Rik	0.289	0.000640898	3.28	3.82	6.23	2.77	1.14	1.59	1.92	1.01
ENSMUSG00000036814	Slc6a20a	2.006	0.000712672	52.87	56.86	44.82	80.91	146.94	189.31	94.24	194.07
ENSMUSG00000025194	Abcc2	2.193	0.000712672	8.57	11.32	7.26	6.63	24.95	25.12	27.1	24.05
ENSMUSG00000002831	Plin4	3.018	0.000718132	2.68	2.62	2.67	3.61	5.23	11.15	5.34	24.06
ENSMUSG00000058618	AY761184	0.397	0.000815219	3908.61	2703.66	2287.8	2277.69	1912.81	1033.93	1590.48	904.05
ENSMUSG00000041481	Serpina3g	0.438	0.000863973	24.61	5.81	31.28	15.34	7.76	7.98	9.66	9.44
ENSMUSG00000040488	Ltbp4	2.02	0.000885403	12.92	7.75	11.69	7.86	17.68	36.28	14.83	30.63
ENSMUSG00000096410	Ighv1-19	2.364	0.000958261	88.68	36.51	108.16	80.58	175.72	166.94	204.2	358.9
ENSMUSG00000105096	Gbp10	0.158	0.00116859	2.16	0.14	3.01	2.08	0.92	0.81	0.33	0.62
ENSMUSG00000075602	Ly6a	0.445	0.00124972	74.25	30	106.35	84.01	45.19	43.63	33.37	37.49
ENSMUSG00000066363	Serpina3f	0.104	0.00129848	6.73	0.63	8.61	1.78	0.45	0.45	0.6	0.87
ENSMUSG00000078853	Igtp	0.07	0.00149113	249.4	7.47	183.24	38.16	12.61	9.25	6.98	12.38
ENSMUSG00000055978	Fut2	0.284	0.00158888	1.24	1.08	4.99	3.54	0.54	1.1	0.31	1.07
ENSMUSG00000019737	Syne4	0.478	0.0015912	6.26	2.94	8.16	5.97	5.67	3.44	2.35	3.25
ENSMUSG00000021751	Acox2	2.125	0.00162935	3.85	3.92	2.87	4.47	8.55	11.33	7.41	9.62
ENSMUSG00000056666	Retsat	2.225	0.00188251	45.14	27.9	18.13	25.29	62.29	97.67	81.83	71.15
ENSMUSG00000029752	Asns	0.41	0.00188508	31.71	9.9	37.47	18.86	13.39	10.97	15.02	10.88
ENSMUSG00000031790	Mmp15	2.276	0.00190543	2.63	4.68	3.51	3.41	8.58	16.7	5.63	11.11
ENSMUSG00000023828	Slc22a3	2.551	0.00208214	1.37	2.02	0.65	1.75	3.64	6.9	4	6.39
ENSMUSG00000050982	Apol10a	0.387	0.0021402	334.47	75.78	323.04	167.15	121.4	101.93	71.74	138.55
ENSMUSG00000079547	H2-DMb1	0.473	0.00219161	177.04	75.31	228.76	119.45	76.38	84.71	79.01	110.81
ENSMUSG00000082292	Gm12250	0.095	0.00219713	57.33	2.15	38.12	14.78	5.81	1.53	2.02	2.84
ENSMUSG00000104346	Pcdhga3	4.231	0.00229626	0.07	0.04	0.08	0.06	0.28	0.6	0.17	0.3
ENSMUSG00000040328	Olfr56	0.139	0.00230093	20.35	2.15	14.02	6.41	2.31	0.53	1.63	1.69
ENSMUSG00000030834	Abcc6	2.098	0.0023299	3.63	1.97	1.27	1.34	4.31	4.63	1.29	5.3
ENSMUSG00000034645	Zyg11a	2.554	0.0023355	0.39	0.61	0.42	0.88	1.7	2.06	1.19	2.75
ENSMUSG00000050014	Apol10b	0.355	0.00247806	6.19	1.53	6.62	3.15	2.11	1.49	2.06	2.08
ENSMUSG00000003555	Cyp17a1	5.723	0.00284724	0.08	0.32	0.03	0.09	0.97	0.9	1.34	0.57
ENSMUSG00000037583	Nr0b2	5.14	0.00308836	0.28	0.62	0.95	0.05	2.29	4.45	3.69	1.54
ENSMUSG00000111514	E230014E18Rik	0.121	0.00310217	0.78	0.07	1.39	0.18	0.29	0.01	0.06	0.16
ENSMUSG00000029797	Sspo	2.622	0.00328096	0.19	0.23	0.07	0.16	1.09	0.63	0.27	0.39
ENSMUSG00000073705	Cenps	0.478	0.00332616	9.4	6.06	7.96	5.84	5.38	3.46	5.56	4.02
ENSMUSG00000024421	Lama3	2.408	0.00334828	3.64	7.76	2.84	7.7	14.08	18.27	9.64	21.03
ENSMUSG00000025196	Cpn1	2.806	0.00341414	0.49	1.21	1	1.28	3.22	5.78	1.83	3.45
ENSMUSG00000066760	Psg16	0.412	0.00343289	0.93	0.55	1.23	1.7	0.72	0.5	0.34	0.7
ENSMUSG00000050158	Olfr165	2.411	0.00354745	4.23	4.34	1.77	6.23	14.72	13.36	9.57	14.26
ENSMUSG00000037335	Hand1	2.045	0.00362142	2.81	1.38	2.53	1.4	3.96	5.72	4.78	5.93
ENSMUSG00000079108	Srp54c	0.421	0.00363832	4.18	2.49	2.38	1.45	1.8	1.11	0.9	1.37
ENSMUSG00000118361	AC132320.1	0.01	0.00364833	3.28	0.02	5.41	0.52	0.05	0	0.03	0
ENSMUSG00000045629	Sh3tc2	2.672	0.003721	0.12	0.31	0.25	0.39	0.98	1.33	0.52	0.92
ENSMUSG00000113161	Gm47457	2.707	0.003721	0.09	0.16	0.13	0.16	0.51	0.47	0.35	0.52
ENSMUSG00000042116	Vwa1	2.126	0.00376717	11.96	6.76	4.82	8.97	19.6	23.65	24.99	19.44
ENSMUSG00000026536	Ifi211	0.497	0.0037851	2.63	1.45	2.89	2.99	1.62	1.36	1.49	1.91
ENSMUSG00000107478	Gm45234	2.426	0.0037851	2.07	1.67	2.05	1.04	3.43	8.04	2.62	7.74
ENSMUSG00000096326	Ighv1-78	3.165	0.00393533	11.08	8.79	4.91	10.08	15.96	44.2	23.14	63.11
ENSMUSG00000005667	Mthfd2	0.421	0.0042347	15.12	3.92	11.63	9.32	5.94	4.11	5.73	4.78
ENSMUSG00000010651	Acaa1b	2.684	0.00427994	8.87	12.83	3.84	13.84	24.16	47.17	33.72	28.14
ENSMUSG00000057074	Ces1g	3.194	0.00433072	0.44	1.17	0.36	1.47	2.33	5.6	2.54	4.08
ENSMUSG00000104713	Gbp6	0.154	0.00437683	35.67	2.89	46.42	22.43	7.25	4.16	2.74	6.04
ENSMUSG00000097194	9330175E14Rik	0.358	0.00475548	1.73	0.39	2.13	1.05	0.48	0.46	0.27	0.73
ENSMUSG00000037386	Rims2	3.089	0.00510007	0.15	0.16	0.29	0.22	0.27	1.6	1.27	0.8
ENSMUSG00000022894	Adamts5	2.265	0.00527128	0.1	0.18	0.12	0.19	0.35	0.55	0.29	0.57
ENSMUSG00000096727	Psmb9	0.265	0.00538572	166.83	33.14	198.08	74.18	40.97	32.44	33.74	40.61
ENSMUSG00000076731	Ighv8-12	2.892	0.00538572	21.24	12.72	59.04	33.67	56.7	128.73	66.56	193.19
ENSMUSG00000028996	Rbp7	0.438	0.00538572	49.53	22.96	24.36	19.07	17.87	14.94	16.66	13.5
ENSMUSG00000079114	Gm7849	0.463	0.00549309	9020.66	7133.75	5013.4	7922.06	6465.63	3396.71	3911.49	2869.05
ENSMUSG00000090381	Gm6158	0.423	0.00554791	10.56	12.09	12.72	5.61	4.64	6.39	6.73	3.87
ENSMUSG00000096422	Igkv12-44	2.222	0.00554791	80.07	88.55	111.38	118.97	364.57	238.15	308.78	132.12
ENSMUSG00000046997	Spsb4	3.483	0.00573417	1.53	3.65	0.34	0.66	3.72	9.93	5.83	5.69
ENSMUSG00000079363	Gbp4	0.372	0.00588771	9.64	1.79	12.78	6.07	3.32	3	3.8	3.86
ENSMUSG00000070427	Il18bp	0.201	0.00595979	31.22	4.22	53.62	15.61	4.83	4.92	4.3	6.74
ENSMUSG00000095007	Igkv12-41	2.851	0.00595979	6.53	9.47	13.58	27.43	46.76	62.02	48.06	37.36
ENSMUSG00000074439	Defa5	0.491	0.00607892	4738.53	5955.26	3552.88	5676.3	4259.16	2507.87	3199.64	2436.52
ENSMUSG00000111340	Gm47171	2.066	0.00633479	2.4	2.44	2.03	4.75	8.23	6.14	5.55	10.82
ENSMUSG00000026531	Mptx1	3.285	0.00634297	0.31	1.41	1.48	0.78	3.87	4.08	5	3.19
ENSMUSG00000117964	AC119228.1	0.307	0.00652086	0.75	0.22	0.91	0.34	0.31	0.13	0.14	0.27
ENSMUSG00000000120	Ngfr	2.091	0.00655225	1.13	0.66	0.92	0.6	1.88	2.96	1.27	2.87
ENSMUSG00000028268	Gbp3	0.464	0.00660618	7.54	2.38	7.93	7.78	5.22	3.48	2.91	3.24
ENSMUSG00000095416	Ighv1-12	2.647	0.00667857	17.74	14.68	11.27	11.51	32.2	79.79	20.92	58.28
ENSMUSG00000115902	D730005E14Rik	0.465	0.0071446	2.12	0.87	1.76	1.49	0.79	0.76	1.16	0.83
ENSMUSG00000069874	Irgm2	0.205	0.0072939	50.17	5.01	41.26	17.71	8.27	6.22	5.55	8.78
ENSMUSG00000029417	Cxcl9	0.252	0.0072939	15.65	2.41	18.2	9.03	3.74	2.93	3.39	4.08
ENSMUSG00000105606	Igkv2-109	2.427	0.007403	27.13	20.32	16.48	23.8	87.32	47.72	30.69	104.75
ENSMUSG00000059842	Zfp341	2.073	0.00750085	0.68	0.6	0.75	0.47	1.1	2.36	1.33	1.65
ENSMUSG00000081984	Dnajb3	0.472	0.00751885	3.71	2.22	3.71	4.47	1.52	2.43	2.28	2.01
ENSMUSG00000034687	Fras1	2.111	0.00781581	0.27	0.34	0.15	0.28	0.76	0.97	0.48	0.79
ENSMUSG00000021294	Kif26a	2.019	0.0079671	0.24	0.17	0.19	0.17	0.55	0.55	0.33	0.58
ENSMUSG00000074874	Ctla2b	0.482	0.00843832	2.4	3.08	3.3	4.18	1.82	2.37	1.69	2.71
ENSMUSG00000006369	Fbln1	2.027	0.00874329	18.65	11.05	12.15	6.09	31.46	30.6	32.74	29.76
ENSMUSG00000105703	Gm43305	0.492	0.00905221	250.82	115.76	145.9	210.11	68.45	114.65	139.59	94.83
ENSMUSG00000078922	Tgtp1	0.12	0.0091311	28.74	1.14	26.41	5.8	2.62	1.71	2.34	2.17
ENSMUSG00000074892	B3galt5	0.478	0.00914147	0.71	0.68	0.79	1.34	0.45	0.83	0.63	1.17
ENSMUSG00000024640	Psat1	0.439	0.00927305	15.43	5.53	18.57	9.21	6.06	4.18	9.83	6.2
ENSMUSG00000116383	Apol10c-ps	0.086	0.00928521	409.06	11.16	357.02	38.86	26.39	14.25	21.1	22.2
ENSMUSG00000020654	Adcy3	2.084	0.00946213	0.34	0.46	0.56	0.69	1.01	2.42	0.71	2.07
ENSMUSG00000058163	Gm5431	0.283	0.00978937	11.33	2.48	14.41	6.79	4.16	4.58	1.8	5.71
ENSMUSG00000074758	Gm5535	0.494	0.00987382	5.02	2.33	6.17	2.56	1.95	1.96	2.43	3.24
ENSMUSG00000040253	Gbp7	0.261	0.0101108	7.75	1.03	6.58	3.76	1.82	1.24	1.07	1.92
ENSMUSG00000098318	Lockd	0.483	0.0101108	0.96	0.5	1.39	1.3	0.54	0.34	0.66	0.32
ENSMUSG00000021943	Gdf10	2.117	0.0101108	0.4	0.2	0.28	0.19	0.6	0.68	0.69	0.9
ENSMUSG00000038037	Socs1	0.198	0.0102688	8.39	1.23	8.6	1.63	1.04	1.47	0.84	1.47
ENSMUSG00000037321	Tap1	0.304	0.0106336	99.43	20.63	113.67	44.1	29.54	24.53	18.84	28.65
ENSMUSG00000027296	Itpka	0.475	0.0109036	28.73	7.24	28.52	12.23	11.04	12.55	8.14	12.92
ENSMUSG00000027249	F2	0.124	0.0111457	0.29	0.07	2.43	0.26	0.1	0.14	0.12	0.08
ENSMUSG00000107191	Gm43579	0.133	0.0112434	0.58	3.35	0.93	0.56	0.39	0.08	0.43	0
ENSMUSG00000014602	Kif1a	2.14	0.0115266	0.22	0.26	0.84	0.2	0.79	1.45	0.39	0.86
ENSMUSG00000001901	Kcnh6	2.16	0.0115976	0.49	0.22	0.31	0.43	0.78	0.91	1.2	1.17
ENSMUSG00000033377	Palmd	2.006	0.0117582	0.79	0.94	0.81	0.88	1.55	2.58	1.49	3.38
ENSMUSG00000023341	Mx2	0.38	0.0117882	3.85	1.45	4.24	4.91	2.59	1.71	0.7	1.75
ENSMUSG00000018924	Alox15	0.301	0.0117882	0.62	0.28	0.75	0.47	0.18	0.07	0.24	0.31
ENSMUSG00000116940	Gm7450	2.281	0.0118246	0.92	1.56	1.58	0.83	2.78	4.67	3.46	3.23
ENSMUSG00000031698	Mylk3	3.125	0.0122288	0.45	0.6	0.06	0.36	1.92	1.21	1.76	1.38
ENSMUSG00000000805	Car4	0.485	0.0122288	270.57	138.4	472.63	148.88	117.83	166.72	153.07	173.16
ENSMUSG00000038453	Srcin1	2.189	0.0125512	0.11	0.17	0.11	0.21	0.29	0.41	0.32	0.4
ENSMUSG00000048852	Gm12185	0.449	0.0132844	13.47	2.07	17.24	4.09	4.69	3.05	2.42	3.44
ENSMUSG00000047517	Dmbt1	0.463	0.0133433	96.38	70.51	228.53	76.92	44.91	74.97	35.83	83.35
ENSMUSG00000093896	Ighv1-76	2.041	0.013665	17.6	10.05	23.55	17.1	41.6	26.89	36.76	52.57
ENSMUSG00000046879	Irgm1	0.226	0.0144067	131.38	14.4	99.42	42.69	28.4	16.62	14.59	20.23
ENSMUSG00000029245	Epha5	0.158	0.0145676	0.14	14.18	5.3	16.61	0.02	0.08	0.01	0.09
ENSMUSG00000031841	Cdh13	2.092	0.0149251	0.63	0.23	0.43	0.45	0.73	1.48	0.67	1.31
ENSMUSG00000046806	Cyren	0.486	0.0156482	1.7	3.47	3.68	3.04	1.23	2.95	1.88	1.53
ENSMUSG00000078920	Ifi47	0.26	0.0156491	100.58	13.09	111.66	52.96	27.17	22.07	14.55	26.94
ENSMUSG00000117748	Chtf8	0.408	0.0159869	12.49	6.8	8.97	4.73	5.44	4.06	4.46	2.86
ENSMUSG00000022847	Thpo	0.463	0.0160733	4.15	1.63	4.11	2.56	1.2	2.97	1.64	2.15
ENSMUSG00000027887	Sypl2	2.138	0.0164548	0.5	0.48	0.19	0.22	0.93	0.75	0.71	0.9
ENSMUSG00000036766	Dner	2.967	0.0167925	0.15	0.04	0.21	0.18	0.39	0.99	0.28	0.9
ENSMUSG00000025817	Nudt5	0.196	0.0175601	129.18	16.19	162.69	14.05	13.03	13.97	15.11	16.94
ENSMUSG00000032292	Nr2e3	2.457	0.0175601	0.86	1.2	0.41	1.05	3.67	2.25	2.84	2.37
ENSMUSG00000099474	1700097N02Rik	0.44	0.0179572	11.65	3.44	9.59	5.07	3.55	3.41	4.58	4.51
ENSMUSG00000111078	Gm35028	0.493	0.0181116	1.49	1.28	2.54	1.52	1.46	0.56	0.97	1.28
ENSMUSG00000028270	Gbp2	0.201	0.0192892	51.5	4.34	59.75	15.94	7.91	6.81	7.28	10.04
ENSMUSG00000058952	Cfi	0.421	0.0198655	0.83	1.28	2.66	1.2	0.86	0.8	0.45	0.73
ENSMUSG00000117147	AC166360.2	0.319	0.0208793	3.99	1.02	1.86	1.05	0.88	0.45	1.22	0.53
ENSMUSG00000087150	BC064078	0.469	0.0209917	0.99	1.04	1.92	1.52	0.64	0.65	1.13	0.69
ENSMUSG00000031551	Ido1	0.228	0.0216839	77.12	9.93	110.42	24.74	14.94	17.56	11.13	17.98
ENSMUSG00000023084	Lrrc71	0.347	0.0217738	0.55	0.41	0.63	0.16	0.11	0.28	0.15	0.24
ENSMUSG00000041559	Fmod	2.51	0.0217738	0.11	0.36	0.37	0.34	0.58	0.9	0.79	1.53
ENSMUSG00000055254	Ntrk2	2.395	0.0217776	0.27	0.14	0.24	0.38	0.62	0.57	0.26	1.25
ENSMUSG00000107597	Gm44764	2.619	0.0220362	0.87	1.45	1.16	0.97	3.97	4.16	2.21	4.69
ENSMUSG00000060615	Ang4	0.499	0.0223084	1740.83	2003.75	1412.67	2127.12	1905.23	876.83	1088.55	746.87
ENSMUSG00000002076	Hsf2bp	0.295	0.0232601	3.51	0.52	1.37	1.02	0.76	0.57	0.69	0.85
ENSMUSG00000052305	Hbb-bs	0.271	0.0249204	264.19	616.84	265.03	1218.85	108.5	297.18	190.29	220.02
ENSMUSG00000069792	Wfdc17	0.434	0.025597	7.18	13.6	8.14	13.75	5.23	3.94	8.1	5.69
ENSMUSG00000081769	Gm12216	0.439	0.0260066	22.27	7.07	24.8	11.28	8.23	7.5	8.57	12.54
ENSMUSG00000095200	Ighv1-7	2.422	0.0261352	18.2	3.61	15.97	12.43	32.83	36.52	47.31	26.21
ENSMUSG00000099647	Gm5776	0.442	0.0270476	6.89	8.44	4.42	5.95	3.64	3.46	4.15	3.14
ENSMUSG00000096459	Ighv9-3	2.637	0.0275418	33.52	9.71	78.49	49.36	108.7	87.24	202.49	110.33
ENSMUSG00000026068	Il18rap	0.5	0.0281641	0.94	0.73	1.09	1.14	0.72	0.34	0.81	0.82
ENSMUSG00000039699	Batf2	0.475	0.0291638	54.59	12.95	49.74	18.46	20.12	23.81	14.6	22.09
ENSMUSG00000095589	Ighv1-55	2.023	0.029368	100.99	56.79	215.9	99.21	263.89	166.96	363.2	322.24
ENSMUSG00000027562	Car2	0.403	0.0297611	11.18	2.47	16.95	2.38	4.41	3.35	4.34	5.3
ENSMUSG00000096299	Gm21814	2.43	0.0309817	0.63	2.68	0.19	1.1	2.67	2.56	1.38	2.08
ENSMUSG00000026587	Astn1	2.496	0.0309913	0.08	0.06	0.05	0.26	0.42	0.36	0.22	0.42
ENSMUSG00000062591	Tubb4a	2.567	0.0314428	0.59	0.27	0.66	0.23	0.78	2.4	0.83	1.7
ENSMUSG00000094546	Ighv1-26	2.038	0.0317462	76.17	26.69	58.94	42.14	105.47	97.33	81.47	232.84
ENSMUSG00000013921	Clip3	2.214	0.0321731	2.53	0.47	1.06	0.33	1.3	3.19	0.97	3.13
ENSMUSG00000079445	B3gnt7	0.219	0.0323496	17.64	3.75	50.04	7.6	5.12	6.7	3.76	5.07
ENSMUSG00000068452	Duox2	0.178	0.0328805	8.99	13.69	103.39	9.49	6.25	7.42	4.98	10.02
ENSMUSG00000027224	Duoxa1	0.23	0.032914	0.51	0.18	2.67	0.31	0.13	0.49	0.21	0.47
ENSMUSG00000055184	Fam72a	0.422	0.0349151	0.52	0.45	0.77	0.63	0.47	0.29	0.17	0.32
ENSMUSG00000073940	Hbb-bt	0.278	0.0372881	32.42	77.84	35.43	157.96	12.34	41.75	22.69	31.75
ENSMUSG00000074115	Saa1	0.121	0.0374363	8.38	304.76	224.96	246.66	9.66	35.2	10.55	74.8
ENSMUSG00000074151	Nlrc5	0.307	0.0380681	19.83	2.75	26.24	9.91	5.91	3.28	3.53	6.17
ENSMUSG00000106715	Tmem265	0.362	0.0384297	1.28	2.88	2.07	2.17	2.04	0.38	1.03	0.59
ENSMUSG00000031489	Adrb3	2.054	0.0384781	1.62	1.71	2.27	1.91	2.69	5.31	3.23	12.98
ENSMUSG00000103567	Pcdhga5	2.711	0.0384781	0.06	0.11	0.04	0.11	0.26	0.24	0.3	0.36
ENSMUSG00000030495	Slc7a10	2.55	0.0384781	0.55	0.36	0.91	0.48	1.87	1.97	0.9	2.77
ENSMUSG00000064032	Gm10143	0.297	0.0405354	0.45	0.1	0.39	0.58	0.25	0.05	0.08	0.18
ENSMUSG00000027419	Pcsk2	2.118	0.0405934	0.3	0.08	0.27	0.26	0.54	0.76	0.37	0.71
ENSMUSG00000040978	Gm11992	0.388	0.0407158	1.02	0.21	1.36	0.88	0.41	0.33	0.29	0.64
ENSMUSG00000040127	Sdr9c7	2.251	0.0407823	2.02	2.78	0.76	1.22	4.41	4.78	7.25	5.92
ENSMUSG00000039021	Ttc16	0.433	0.040868	0.9	0.39	1.33	0.39	0.43	0.37	0.3	0.48
ENSMUSG00000026840	Lamc3	2.048	0.0428317	0.21	0.1	0.16	0.13	0.35	0.52	0.23	0.48
ENSMUSG00000035692	Isg15	0.487	0.044619	61.48	42.45	66.11	100.37	79.42	28.39	26.15	27.35
ENSMUSG00000051323	Pcdh19	2.205	0.0452071	0.27	1.23	0.14	16.28	1.8	13.35	0.82	1.37
ENSMUSG00000076570	Igkv12-38	5.042	0.0452887	2.22	1.58	12.93	3.17	37.74	2.99	7.04	72.84
ENSMUSG00000079362	Gm43302	0.158	0.0454379	7.08	0.2	8.13	2.29	0.8	1.37	0.38	1.06
ENSMUSG00000032649	Colgalt2	2.186	0.0464187	0.13	0.18	0.13	0.13	0.42	0.47	0.27	0.42
ENSMUSG00000020620	Abca8b	2.012	0.0464705	0.2	0.17	0.22	0.52	0.8	0.76	0.4	0.87
ENSMUSG00000025161	Slc16a3	0.5	0.0465948	14.54	6.23	27.35	5.35	8.84	9.43	8.69	8.32
ENSMUSG00000032033	Barx2	0.436	0.0465963	5.14	7.85	10.85	1.91	2.3	3.27	2.94	6.04
ENSMUSG00000076512	Igkv9-123	0.27	0.0474947	10.58	3.17	5.84	25.6	2.14	2.74	2.46	8
ENSMUSG00000060675	Pla2g16	0.32	0.0474947	65.12	8.4	84.05	15.69	10.11	10.79	12.46	16.62
ENSMUSG00000095565	Ighv2-9-1	2.328	0.0499198	24.7	7.65	23.49	24.85	33.38	36.27	96.77	52.67

## Sheet: DE genes2
Gene_id	Gene name	FC(EGCG/HFD)	Padjust	TPM
				HFD_1	HFD_2	HFD_3	HFD_4	EGCG_1	EGCG_2	EGCG_4
ENSMUSG00000024486	Hbegf	2.604	7.87366e-12	10.69	9.9	9.76	15.38	22.65	26.71	21.41
ENSMUSG00000066687	Zbtb16	4.094	9.54429e-10	0.31	0.26	0.25	0.46	0.99	1.09	0.9
ENSMUSG00000095007	Igkv12-41	0.141	4.58389e-09	46.76	62.02	48.06	37.36	7.19	6.22	3.84
ENSMUSG00000025515	Muc2	0.311	1.78219e-08	341.27	664.78	237.88	443.61	87.35	113.2	116.91
ENSMUSG00000021775	Nr1d2	2.336	8.15191e-08	7	4.42	5.54	6.48	8.94	11.35	11.69
ENSMUSG00000064358	mt-Co3	2.27	4.02196e-07	625.05	593.18	330.01	522.26	870.69	979.3	940.42
ENSMUSG00000055748	Gsdmc4	0.395	7.44528e-07	21.91	15.65	18.25	19.16	6.06	7.36	4.58
ENSMUSG00000071551	Akr1c19	2.616	8.07804e-07	42.81	24.58	34.17	28.26	66.47	95.13	58.42
ENSMUSG00000050912	Tmem123	2.303	1.33559e-06	16	14.56	16.34	17.42	24.1	26.11	38.39
ENSMUSG00000047517	Dmbt1	0.307	1.50741e-06	44.91	74.97	35.83	83.35	10.02	12.4	19.13
ENSMUSG00000040747	Cd53	2.438	3.25431e-06	11.83	10.77	13.85	12.96	19.53	21.89	31.11
ENSMUSG00000048970	C1galt1c1	2.017	3.92864e-06	26.33	22.25	20.56	23.57	28.84	41.43	42.07
ENSMUSG00000050921	P2ry10	4.426	4.84662e-06	1.37	1.15	1.52	1.76	2.46	3.71	8.97
ENSMUSG00000079494	Nat8f5	2.47	6.89824e-06	13.18	17.78	17.54	14.43	25.95	43.08	25.74
ENSMUSG00000047730	Fcgbp	0.356	6.89824e-06	842.23	1733.54	616.17	1052.44	254.91	265.06	212.28
ENSMUSG00000050075	Gpr171	3.795	6.89824e-06	1.15	1.18	1.25	1.15	1.87	3.46	5.53
ENSMUSG00000081406	Rps6-ps4	3.118	6.89824e-06	89.43	107.35	103.55	64.3	179.45	172.46	336.33
ENSMUSG00000079180	Mptx2	3.053	8.02241e-06	451.33	250.09	341.14	232.27	553.44	802.68	1030.8
ENSMUSG00000027318	Adam33	0.366	8.02241e-06	5.26	6.59	4.05	5.48	1.12	1.95	1.84
ENSMUSG00000068452	Duox2	0.478	8.09509e-06	6.25	7.42	4.98	10.02	2.27	2.87	3.1
ENSMUSG00000079298	Klrb1b	2.499	9.33246e-06	1.37	1.73	1.43	2.05	2.28	3.22	3.63
ENSMUSG00000047454	Gphn	0.331	1.10789e-05	277.47	269.03	88.44	169.22	20.61	47.66	53.23
ENSMUSG00000020077	Srgn	2.089	1.10789e-05	26.85	25.92	26.59	31.59	39.2	39.83	56.42
ENSMUSG00000031431	Tsc22d3	2.184	1.12033e-05	21.09	25.3	28.58	22.84	43.65	48.32	35.88
ENSMUSG00000093867	Gsdmcl2	0.296	1.12033e-05	2.67	2.19	2.77	2.36	0.63	0.67	0.49
ENSMUSG00000023232	Serinc2	0.474	1.19318e-05	54.86	89.52	46.46	72.11	26.26	24.57	23.05
ENSMUSG00000028967	Errfi1	2.195	1.20495e-05	15.32	22.96	21.3	16.57	34.41	37.48	29.81
ENSMUSG00000025002	Cyp2c55	0.299	1.20495e-05	15.14	35.22	14.83	25.7	4.19	3.62	7.95
ENSMUSG00000089929	Bcl2a1b	2.523	1.23745e-05	6.56	5.56	7.19	7.21	12.24	12.12	15.75
ENSMUSG00000025491	Ifitm1	2.045	1.23745e-05	34.52	33.75	38.99	34.76	54.89	55.01	70.37
ENSMUSG00000026581	Sell	3.015	1.67827e-05	2.5	3.19	3.55	3.47	4.87	6.54	12.45
ENSMUSG00000039062	Anpep	0.367	1.7388e-05	2633.88	5056.51	1955.1	3823.27	1289.38	1201.15	774.75
ENSMUSG00000027422	Rrbp1	0.436	1.80669e-05	167.08	235.64	102.78	189.4	61.94	76.15	58.9
ENSMUSG00000050097	Ces2b	0.352	2.23481e-05	7.39	13.78	5.06	7.28	2.13	2.18	2.65
ENSMUSG00000044349	Snhg11	0.368	2.27122e-05	2.27	2.09	1.18	2.33	0.31	0.67	0.72
ENSMUSG00000037033	Clca3b	0.427	2.81163e-05	25.19	23.9	10.63	21.43	6.47	7.07	6.73
ENSMUSG00000033880	Lgals3bp	0.468	2.92206e-05	114.81	171.1	75.5	121.77	46.7	48.06	42.08
ENSMUSG00000026417	Pigr	0.342	3.35786e-05	167.56	308.48	113.47	424.81	62.24	65.45	69.9
ENSMUSG00000034570	Inpp5j	0.338	5.05726e-05	19.39	34.61	9.64	29.53	6.46	6.09	5.56
ENSMUSG00000024673	Ms4a1	2.992	5.32407e-05	4.16	4.09	5.25	6.15	6.65	9.47	18.89
ENSMUSG00000070777	Ceacam20	0.492	5.64301e-05	58.88	97.86	50.82	101.24	30.42	31.12	30.66
ENSMUSG00000004098	Col5a3	0.379	5.64301e-05	1.33	1.76	0.76	1.77	0.33	0.47	0.44
ENSMUSG00000035202	Lars2	0.391	5.64834e-05	35.16	33.93	12.87	25.76	6.65	9.21	9.02
ENSMUSG00000002083	Bbc3	0.424	6.30614e-05	6.48	9.72	4.66	9.02	2.43	2.08	2.1
ENSMUSG00000037390	Muc3	0.421	6.30614e-05	766.94	1384.38	506.38	897.25	310.34	309	308.83
ENSMUSG00000019122	Ccl9	2.262	6.30614e-05	8.45	7.19	11.94	10.78	12.76	11.54	15.35
ENSMUSG00000019734	Tmc4	0.478	6.30614e-05	112.02	162.7	74.13	139.56	38.95	53.58	41.49
ENSMUSG00000022651	Retnlg	8.826	6.30614e-05	1.69	0.15	1.33	0.92	4.49	4.6	12.88
ENSMUSG00000076281	Gm24270	0.253	7.03728e-05	74.76	93.86	28.6	68.18	9.64	12.8	20.45
ENSMUSG00000037995	Igsf9	0.477	7.0593e-05	99.21	111.48	52.8	103.38	30.27	43.39	28.11
ENSMUSG00000108688	Gm44985	0.426	7.0593e-05	13.1	16.79	8.42	18.82	4.27	5.69	4.36
ENSMUSG00000031517	Gpm6a	2.292	7.31486e-05	1.4	1.46	1.92	2.12	2.88	2.97	3.61
ENSMUSG00000034634	Ly6d	2.12	7.47488e-05	26.07	33.1	34.57	31.85	47.73	46.11	65.9
ENSMUSG00000042745	Id1	2.189	0.000101512	98.65	190.65	118.96	139.46	282.03	214.35	198.91
ENSMUSG00000109941	Exosc6	4.303	0.00011149	0.75	0.98	1.53	0.52	4.28	3.34	2.39
ENSMUSG00000076655	Ighv4-1	4.409	0.000158178	11.33	9.7	5.87	12.4	57.6	14.9	29.43
ENSMUSG00000051212	Gpr183	2.367	0.000166127	1.71	2	3.51	1.85	2.95	3.12	4.87
ENSMUSG00000023328	Ache	0.45	0.00016662	3.95	3.99	2.08	3.79	0.81	1.36	1.23
ENSMUSG00000031785	Adgrg1	0.454	0.00016662	5.26	6.88	3.79	7.5	2.58	2.93	1.84
ENSMUSG00000115432	D130009I18Rik	0.264	0.000168847	243.22	229.07	70.4	158.25	20.94	46.08	45.18
ENSMUSG00000026049	Tex30	2.085	0.000168863	9.07	6.16	6.65	7.72	11.25	12.65	14.76
ENSMUSG00000045382	Cxcr4	2.117	0.00019981	4.24	5.43	6.4	6.57	8.42	8.28	9.98
ENSMUSG00000029299	Abcg3	2.043	0.0002345	1.76	1.75	1.52	2.32	2.32	2.95	3.61
ENSMUSG00000026064	Ptp4a1	2.363	0.000240632	2.71	2.1	2.27	2.71	3.94	3.28	5.09
ENSMUSG00000071637	Cebpd	2.104	0.000241207	3.94	5.87	4.84	4.33	9.35	7.16	6.01
ENSMUSG00000073987	Ggh	2.105	0.000241207	7.26	4.44	5.16	5.24	9.83	9.65	8.44
ENSMUSG00000038543	BC028528	2.471	0.000241207	3.87	3.58	5.26	6.78	6.99	9.5	8.77
ENSMUSG00000033715	Akr1c14	2.185	0.000257773	22.16	17.77	12.7	20.17	19.24	34.3	41.78
ENSMUSG00000025528	2010106E10Rik	2.085	0.000267711	276.14	245.6	256.55	224.33	262.07	512.61	504.74
ENSMUSG00000090164	BC035044	2.771	0.000287996	1.34	1.45	1.77	3.05	2.68	2.81	4.79
ENSMUSG00000094694	Ighv1-9	0.38	0.000293973	99.07	131.79	54.08	87.89	28.41	36.73	22.14
ENSMUSG00000079495	Nat8f6	3.034	0.000312554	0.78	1.49	1.17	1.01	2.42	2.54	2.64
ENSMUSG00000040035	Disp2	0.403	0.000312554	1.01	1.51	0.61	1.24	0.43	0.35	0.35
ENSMUSG00000008348	Ubc	0.482	0.000312806	280.05	647.12	328.6	526.09	199.06	201.59	157.65
ENSMUSG00000029273	Sult1d1	2.014	0.000312806	88.72	63.57	88.42	75.81	95.39	140.48	151.97
ENSMUSG00000022372	Sla	2.123	0.00031381	3.78	3.4	5.06	4.38	5.56	7.46	8.15
ENSMUSG00000023078	Cxcl13	2.838	0.000328371	5.5	7.67	9.43	9.67	11.48	14.13	29.35
ENSMUSG00000055827	Gsdmc3	0.49	0.000349162	5.86	4.38	4.75	5.88	2.02	2.69	1.83
ENSMUSG00000053113	Socs3	2.091	0.000372608	9.91	11.36	13.13	12.7	23.02	14.07	21.97
ENSMUSG00000010205	Raver1	0.489	0.00039404	14.83	22.99	10.78	23.13	7.49	7.3	5.58
ENSMUSG00000007817	Zmiz1	0.463	0.000396998	20.78	34.14	13.22	30.56	7.46	10.72	8.08
ENSMUSG00000030681	Mvp	0.471	0.000398104	90.74	156.23	62.9	136.76	45.92	41	32.87
ENSMUSG00000037989	Wnk2	0.489	0.000401058	10.49	12.31	4.61	10.46	2.88	3.71	3.24
ENSMUSG00000113555	Gm10095	2.501	0.00042161	14.27	17.7	28.01	31.63	36.76	57.88	44.18
ENSMUSG00000054999	Naaladl1	0.4	0.000422942	890.11	1845.95	504.49	1255.44	363.83	388.12	284.21
ENSMUSG00000050370	Ch25h	2.991	0.000438049	0.78	0.76	1.33	1.23	2.48	2.77	2.16
ENSMUSG00000051375	Pcdh1	0.488	0.000446068	15.8	26.13	12.1	26.81	7.71	8.07	5.33
ENSMUSG00000021250	Fos	2.501	0.000456195	19.23	41.81	42.11	59.12	79.27	103.04	58.64
ENSMUSG00000094840	Muc3a	0.481	0.000471742	16.69	24.44	10.99	18.34	4.52	8.02	7.57
ENSMUSG00000040899	Ccr6	2.42	0.000513312	2.43	1.74	2.06	2.19	3.56	4	6.46
ENSMUSG00000021268	Meg3	0.409	0.000513312	8.66	11.9	5.69	8.13	0.69	3.88	3.2
ENSMUSG00000059824	Dbp	2.539	0.000515248	3.02	3.71	3.35	4.66	9.4	5.75	5.07
ENSMUSG00000071068	Treml2	2.522	0.000517781	0.64	1.03	1.22	1.55	1.69	1.98	2.96
ENSMUSG00000036057	Ptpn23	0.49	0.000541608	8.04	13.29	4.79	8.59	2.78	4.46	3.33
ENSMUSG00000001552	Jup	0.467	0.000573101	50.46	91.76	36.5	80.74	25.84	25.11	20.02
ENSMUSG00000030739	Myh14	0.41	0.000574619	143.55	239.27	67.51	170.6	54.71	57.3	38.13
ENSMUSG00000025915	Sgk3	2.009	0.000582844	2.7	1.8	2.3	3.41	2.92	4.41	4.45
ENSMUSG00000019948	Actr6	2.292	0.000586112	1.93	1.8	2.66	1.76	2.42	4.19	3.73
ENSMUSG00000065987	Cd209b	3.181	0.000589969	0.58	0.53	0.32	0.53	1.38	1.16	1.46
ENSMUSG00000027398	Il1b	2.576	0.000597773	2.4	2.49	3.13	3.76	3.4	8.57	5.96
ENSMUSG00000031698	Mylk3	2.056	0.000597773	1.92	1.21	1.76	1.38	2.49	2.75	2.37
ENSMUSG00000041605	Inava	0.496	0.000626096	21.89	35.98	14.03	29.42	9.55	10.79	9.26
ENSMUSG00000074406	Zfp628	0.349	0.000641174	3.46	4.91	1.79	3.78	0.72	1.64	0.62
ENSMUSG00000024388	Myo7b	0.495	0.000643945	55.8	97.97	48.72	97.69	32.71	31.38	22.1
ENSMUSG00000019792	Trmt11	2.004	0.000661927	2.94	2.65	3.09	2.84	3.12	4.93	5.55
ENSMUSG00000004187	Kifc2	0.433	0.000670763	4.7	6.11	2.89	5.5	0.92	2.31	1.97
ENSMUSG00000062585	Cnr2	2.33	0.000678486	0.71	1.08	1.11	1.56	1.81	1.68	2.57
ENSMUSG00000002250	Ppard	0.496	0.000683259	24.61	43.52	18.36	34.17	10.17	15.66	10.3
ENSMUSG00000117942	AC115631.1	0.478	0.000686999	9.11	12.34	6.03	8.78	3.08	2.8	4.25
ENSMUSG00000067341	H2-Eb2	2.316	0.000686999	1.68	1.77	2.44	2.59	2.78	3.52	5.52
ENSMUSG00000034641	Cd300ld	2.375	0.000707339	0.66	0.91	0.91	1.03	1.43	1.46	2.04
ENSMUSG00000005198	Polr2a	0.472	0.000759804	17.1	27.51	9.16	21.69	4.95	8.18	6.81
ENSMUSG00000087291	Gm11946	0.445	0.00079231	8.02	9.09	4.87	6.74	1.45	3.33	2.67
ENSMUSG00000030469	Zfp719	2.02	0.00079231	1.91	1.49	1.97	1.92	2.13	2.62	3.66
ENSMUSG00000018620	Mmp20	2.978	0.000819942	0.75	0.44	0.35	0.37	0.82	1.07	1.51
ENSMUSG00000028957	Per3	2.053	0.000841304	2.23	1.91	1.1	1.82	1.92	3.52	2.61
ENSMUSG00000079114	Gm7849	2.307	0.000875592	6465.63	3396.71	3911.49	2869.05	9092.89	7416.93	7004.04
ENSMUSG00000029561	Oasl2	0.469	0.000905094	56.53	35.33	23.69	35.59	10.7	18.22	15.84
ENSMUSG00000030960	Eef1akmt2	2.006	0.000965449	9.4	6.65	6.2	9.52	8.31	13.41	14
ENSMUSG00000044763	Trmt10c	2.077	0.00100623	4.72	3.7	3.37	3.43	4.61	5.7	8.65
ENSMUSG00000035441	Myo1d	0.477	0.00103572	35.77	62.46	25.4	60.79	19.24	18.39	13.15
ENSMUSG00000020120	Plek	2.217	0.00105236	2.61	1.88	2.11	2.87	2.64	3.8	6.08
ENSMUSG00000024810	Il33	2.579	0.001054	3.08	2.36	4.22	2.27	4.49	5.59	8.84
ENSMUSG00000002227	Mov10	0.473	0.00106654	9.39	18.27	7.57	17.17	4.93	5.47	4.38
ENSMUSG00000007034	Slc44a4	0.411	0.00123587	87.11	188.26	50.42	155.46	42.89	36.45	33.44
ENSMUSG00000032373	Car12	0.468	0.00131291	10.05	19.99	7.05	13.19	4.95	4.85	4.31
ENSMUSG00000054203	Ifi205	2.632	0.00133971	1.84	1.76	1.02	1.92	2.13	3.05	4.9
ENSMUSG00000038534	Osbpl7	0.471	0.00140111	13.15	19.74	7.03	15.25	5.09	5.65	6.06
ENSMUSG00000037944	Ccr7	2.303	0.00145475	1.81	2.64	3.06	2.95	3.33	4.46	6.67
ENSMUSG00000030148	Clec4a2	2.078	0.00151911	3.25	4.91	2.96	2.95	4.65	6.35	5.01
ENSMUSG00000052305	Hbb-bs	2.299	0.00156461	108.5	297.18	190.29	220.02	403.87	258.35	441.13
ENSMUSG00000062380	Tubb3	0.362	0.00159695	3.18	7.71	2.23	4.89	1.3	1.52	0.99
ENSMUSG00000009246	Trpm5	0.435	0.00159869	2.28	4.12	1.9	4.03	0.98	1.35	0.91
ENSMUSG00000074272	Ceacam1	0.497	0.00159869	330.89	679.23	275.95	553.2	188.06	198.91	173.55
ENSMUSG00000027513	Pck1	2.114	0.00160458	33.3	41.66	48.96	67.44	65.47	124.51	56.08
ENSMUSG00000003824	Syce2	2.06	0.00161273	4.09	3.46	4.24	4.43	7.68	7.76	6.37
ENSMUSG00000104340	Gm10522	2.84	0.00166286	1.69	1.88	0.65	2.3	4.29	2.96	4.06
ENSMUSG00000086128	St8sia3os	0.42	0.00167558	1.36	1.15	1.05	1.03	0.23	0.39	0.48
ENSMUSG00000030031	Kbtbd8	2.349	0.00172194	0.79	0.45	0.41	0.58	0.76	1.09	1.2
ENSMUSG00000020829	Slc46a1	0.457	0.00177356	4.79	7.46	6.11	6.2	3.15	2.13	1.6
ENSMUSG00000079293	Clec7a	2.237	0.00177356	6.45	5.09	6.18	5.69	7.44	9.06	17.98
ENSMUSG00000052631	Sh2d6	0.394	0.00177356	4.34	7.82	2.63	6.09	1.29	1.71	1.73
ENSMUSG00000031391	L1cam	0.475	0.00187197	10.55	14.26	6.04	13.77	2.68	4.51	4.85
ENSMUSG00000029811	Aoc1	0.457	0.00192341	347.83	705.91	239.17	600.86	181.49	196.94	121.41
ENSMUSG00000034579	Pla2g3	0.389	0.00200017	1.21	1.85	0.88	2.13	0.32	0.55	0.49
ENSMUSG00000020492	Ska2	2.108	0.00200872	2.56	2.57	2.2	2.1	2.47	3.44	5.15
ENSMUSG00000097845	A230020J21Rik	2.959	0.0022543	1.05	3.16	2.66	2.28	6.55	5.38	4.24
ENSMUSG00000026204	Ptprn	0.356	0.00239802	2.08	3.22	0.76	2.23	0.62	0.71	0.51
ENSMUSG00000016349	Eef1a2	0.364	0.00245638	1.63	3.88	1.33	3.52	0.77	0.73	0.68
ENSMUSG00000097542	Gm26751	0.411	0.00252018	0.71	1.28	0.71	1.5	0.36	0.37	0.28
ENSMUSG00000032548	Slco2a1	0.491	0.0027248	9.72	18.23	6.58	15.53	4.62	5.68	4.03
ENSMUSG00000014602	Kif1a	0.391	0.00277288	0.79	1.45	0.39	0.86	0.26	0.31	0.18
ENSMUSG00000073940	Hbb-bt	2.455	0.00288511	12.34	41.75	22.69	31.75	55.85	35.61	63.55
ENSMUSG00000052026	Slc6a7	0.4	0.00291688	4.65	4.97	2.15	3.87	0.59	1.58	1.68
ENSMUSG00000024790	Sac3d1	0.43	0.00294224	84.61	151.13	39.08	72.41	30.24	34.32	22.81
ENSMUSG00000038486	Sv2a	0.345	0.00301074	0.65	1.66	0.53	0.84	0.17	0.15	0.21
ENSMUSG00000014786	Slc9a5	0.436	0.00321233	1	0.9	0.81	0.98	0.19	0.4	0.37
ENSMUSG00000031919	Tmed6	2.336	0.00330752	10.68	6.6	8.68	4.55	16.1	15.5	12.07
ENSMUSG00000074657	Kif5a	0.406	0.00330756	0.76	1.4	0.47	1.08	0.29	0.29	0.28
ENSMUSG00000079317	Trappc2	2.001	0.00346857	2.91	3.11	1.71	2.53	3.29	3.68	5.28
ENSMUSG00000109685	Gm45912	0.397	0.00354637	35.32	29.54	18.27	21.98	5.11	7.01	12.8
ENSMUSG00000074768	Bhmt	0.31	0.0036617	0.63	1.16	0.55	1.24	0.14	0.21	0.27
ENSMUSG00000052485	Tmem171	0.467	0.00368916	15.45	30.27	12.08	22.83	9.28	7.13	5.47
ENSMUSG00000032661	Oas3	0.462	0.00368916	8.19	7.18	4.03	5.04	1.37	3.42	2.26
ENSMUSG00000026452	Syt2	0.35	0.00371355	1.81	2.48	0.97	2.35	0.54	1.13	0.72
ENSMUSG00000095130	Ighv1-39	0.368	0.00389413	35.73	35.1	44.72	81.91	14.2	22.34	8.48
ENSMUSG00000087107	AI662270	2.122	0.00389593	3.66	8.22	5.66	4.52	6.93	9.69	13.91
ENSMUSG00000069919	Hba-a1	2.172	0.00392937	44.41	123.69	84.16	106.45	198.91	114.43	171.17
ENSMUSG00000026358	Rgs1	2.078	0.00395439	6.57	9.29	9.52	15.88	11.43	15.13	19.4
ENSMUSG00000026981	Il1rn	2.036	0.00403829	1.15	2.69	2.77	1.74	6.56	3.31	3.84
ENSMUSG00000059994	Fcrl1	2.131	0.00405478	2.79	2.41	3.21	2.76	3.48	3.96	6.8
ENSMUSG00000015314	Slamf6	2.514	0.00407149	1.73	1.29	1.94	1.3	1.77	1.64	4.16
ENSMUSG00000022199	Slc22a17	0.476	0.00407508	3.84	4.56	1.95	3.83	1.02	1.31	1.3
ENSMUSG00000084384	Gm12251	0.347	0.00408469	3.86	7.59	1.35	4.85	0.7	1.19	1.65
ENSMUSG00000030156	Cd69	2.64	0.00436898	1.07	1.11	1.32	2.05	1.8	2.21	4.59
ENSMUSG00000022015	Tnfsf11	3.392	0.00454619	0.4	0.48	0.23	0.55	0.71	0.65	1.88
ENSMUSG00000070280	Slc22a14	0.473	0.00482569	1.58	1.77	1.37	1.49	9.92	0.88	0.62
ENSMUSG00000047880	Cxcr5	2.154	0.00489284	2.07	3.44	3.37	5.92	4.17	5.19	9.84
ENSMUSG00000064032	Gm10143	4.427	0.00510083	0.25	0.05	0.08	0.18	0.39	0.31	0.76
ENSMUSG00000049744	Arhgap15	2.381	0.00585377	1.65	1.34	1.44	1.94	1.86	2.04	5.11
ENSMUSG00000096459	Ighv9-3	0.419	0.00585377	108.7	87.24	202.49	110.33	57.5	46.59	32.21
ENSMUSG00000097625	Gm26561	0.252	0.00585838	231.03	250.74	75.47	142.17	15.81	42.32	47.63
ENSMUSG00000038323	1700066M21Rik	2.101	0.00591271	1.06	0.96	1.35	1.16	1.39	1.61	3.35
ENSMUSG00000089996	Tmsb15b2	2.516	0.00601918	4.98	8.22	12.52	10.48	35.79	39.97	31.06
ENSMUSG00000105373	Gm42429	0.359	0.00616538	13.15	29.34	13.12	10.38	5.89	3.14	5.07
ENSMUSG00000107728	Gm38910	0.406	0.00622833	1.12	1.81	0.8	1.25	0.38	0.35	0.45
ENSMUSG00000020614	Fam20a	0.481	0.00640028	10.94	22.55	7.01	19.91	5.12	6.24	4.4
ENSMUSG00000103217	Gm38287	2.957	0.00654657	0.71	0.51	0.38	1.87	2.33	1.84	1.66
ENSMUSG00000025432	Avil	0.469	0.00657973	2.53	5.47	2.13	3.89	1.63	1.37	1.01
ENSMUSG00000024371	C2	0.465	0.00662123	10.8	19.31	7.52	20.85	7.25	6.3	5.34
ENSMUSG00000040710	St8sia4	2.299	0.00695544	1.16	0.91	0.88	1.41	0.99	1.64	3.31
ENSMUSG00000025813	Homer2	2.078	0.00707735	11.76	6.34	16.73	8.17	22.21	22.9	15.8
ENSMUSG00000003882	Il7r	2.031	0.00712826	2.67	2.07	1.84	2.42	2.12	3.21	5.17
ENSMUSG00000027419	Pcsk2	0.432	0.00715395	0.54	0.76	0.37	0.71	0.17	0.24	0.19
ENSMUSG00000079620	Muc4	0.457	0.00781563	2.34	2.37	3.28	2.4	0.46	0.8	1.12
ENSMUSG00000022674	Ube2v2	2.084	0.00791079	11.36	8.74	8.63	9.15	7.52	13.49	25.87
ENSMUSG00000027368	Dusp2	2.085	0.00795579	1.8	1.76	2	2.02	2.24	2.83	4.11
ENSMUSG00000050359	Sprr1a	0.367	0.00795579	6.48	21.06	6.02	10.35	3.65	3.87	1.99
ENSMUSG00000029797	Sspo	0.382	0.0081394	1.09	0.63	0.27	0.39	0.23	0.14	0.3
ENSMUSG00000117050	AC167363.2	2.035	0.00843265	2.38	2.7	3.74	3.81	5.12	6.4	4.01
ENSMUSG00000078878	Gm14305	2.517	0.00845796	2.07	1.77	1.65	3.56	3.24	2.97	7.2
ENSMUSG00000095258	Gm10593	3.276	0.00871895	1.85	1	1.97	2.97	3.15	4.54	8.48
ENSMUSG00000004113	Cacna1b	0.372	0.00886251	0.66	0.77	0.48	0.84	0.24	0.45	0.13
ENSMUSG00000036469	March1	2.014	0.00928762	1.24	1.57	1.63	1.9	1.6	2.22	3.71
ENSMUSG00000109378	Gm49396	0.478	0.00948042	6.21	5.67	7.55	7.11	0.76	3.86	1.66
ENSMUSG00000025650	Col7a1	0.303	0.00958748	0.53	0.32	0.07	0.36	0.04	0.47	0.19
ENSMUSG00000038147	Cd84	2.164	0.0102436	2.05	1.97	2.02	2.6	2.2	2.45	8.04
ENSMUSG00000107478	Gm45234	0.465	0.0102853	3.43	8.04	2.62	7.74	2.07	1.45	2.26
ENSMUSG00000052013	Btla	2.223	0.0104366	2.78	2.54	2.73	3.53	2.3	4.38	8.84
ENSMUSG00000028970	Abcb1b	2.028	0.0104917	0.7	0.6	1.69	0.8	1.5	1.94	1.91
ENSMUSG00000023057	Fabp2	2.096	0.0105666	10593.9	6147.77	12365.6	7019.72	8957.14	17632	20540.8
ENSMUSG00000035164	Zc3h12c	2.096	0.0105666	0.27	0.19	0.26	0.26	0.29	0.47	0.47
ENSMUSG00000068105	Tnfrsf13c	2.205	0.010704	6.75	5.07	6.66	4.9	6.23	7.14	16.67
ENSMUSG00000023011	Faim2	0.341	0.010805	0.55	1.62	0.26	1.02	0.1	0.25	0.25
ENSMUSG00000037217	Syn1	0.25	0.010805	0.41	0.83	0.15	0.66	0.13	0.1	0.06
ENSMUSG00000063535	Zfp773	0.451	0.010805	2.52	4.55	1.33	3.35	0.65	1.05	1.41
ENSMUSG00000048763	Hoxb3	0.483	0.0110438	4	9.6	3.63	9.73	2.06	1.98	3.3
ENSMUSG00000063239	Grm4	0.298	0.0114809	0.4	0.83	0.24	0.68	0.07	0.2	0.11
ENSMUSG00000083773	Gm13394	0.388	0.0117081	3.61	4.92	4.51	2.36	1.16	0.84	1.57
ENSMUSG00000113136	Gm19951	3.247	0.0117081	0.41	0.85	0.89	1.12	0.84	1.73	3.75
ENSMUSG00000090086	AI480526	0.457	0.0120723	18.67	14.96	8.22	12.67	2.92	5.77	6.65
ENSMUSG00000057191	AB124611	2.343	0.0121251	1.08	1.49	2.63	2.9	3.74	3.04	4.41
ENSMUSG00000044583	Tlr7	2.2	0.0122425	0.59	0.4	0.34	0.56	0.52	0.81	1.12
ENSMUSG00000078881	Gm14434	3.039	0.0123837	3.58	4.08	1.98	1.27	2.82	5.49	7.02
ENSMUSG00000026616	Cr2	2.163	0.0125275	1.55	2.2	1.63	1.75	1.59	2.62	5.42
ENSMUSG00000043832	Clec4a3	2.452	0.0126274	0.94	0.93	1.4	0.85	1.91	1.81	2.13
ENSMUSG00000032028	Nxpe2	2.586	0.012751	0.49	0.42	0.36	0.44	0.36	0.56	1.1
ENSMUSG00000043336	Filip1l	0.335	0.0128048	2560.31	2262.91	749.65	1457.5	221.3	474.94	502.41
ENSMUSG00000050822	Slc29a4	0.428	0.0135805	0.93	2.31	0.78	1.66	0.44	0.46	0.5
ENSMUSG00000031112	Stk26	2.099	0.0139907	0.74	0.61	0.89	0.86	0.84	1.11	1.95
ENSMUSG00000010760	Phlda2	2.771	0.0142349	1.22	1.9	1.56	1.19	2.21	4.51	2.19
ENSMUSG00000053706	B430305J03Rik	2.087	0.0142349	0.65	0.6	1.32	1.21	1.67	1.55	1.54
ENSMUSG00000099974	Bcl2a1d	2.007	0.0150513	3.64	3.95	5.62	5.51	5.05	7.44	10.01
ENSMUSG00000039634	Zfp189	2.076	0.0153127	0.48	0.46	0.44	0.69	0.69	0.76	1.06
ENSMUSG00000093894	Ighv1-53	0.471	0.0157586	100.26	128.33	149.25	105.83	50.26	24.82	63.09
ENSMUSG00000064057	Scgb3a1	2.523	0.0159895	3.11	3.67	1.97	3.16	5.86	5.87	5.94
ENSMUSG00000000753	Serpinf1	0.465	0.0161415	2.12	5.87	2.94	4.48	1.68	1.41	1.43
ENSMUSG00000097122	Gm26624	0.266	0.0163979	0.49	0.38	0.18	0.48	0.04	0.18	0.04
ENSMUSG00000043419	Rnf227	2.598	0.0166959	0.57	0.32	0.78	0.35	1.2	1.47	1.3
ENSMUSG00000022876	Samsn1	2.259	0.0168603	1.77	1.43	1.11	1.89	1.32	2.47	4.54
ENSMUSG00000024675	Ms4a4c	2.322	0.017028	4.99	0.84	2.32	4.46	4.74	2.73	5.4
ENSMUSG00000020131	Pcsk4	0.494	0.0170657	5.1	6.45	2.86	4.23	0.89	2.33	2.17
ENSMUSG00000037922	Bank1	2.144	0.0175586	2.33	2.09	2.41	2.81	1.93	3.57	7.25
ENSMUSG00000073008	Gpr174	2.681	0.0176014	0.68	0.37	0.9	0.37	0.39	0.6	1.64
ENSMUSG00000096499	Ighv1-5	0.269	0.0176079	29.78	37.24	12.05	8.09	7.77	5.38	2.47
ENSMUSG00000117814	AC122442.1	0.424	0.0176899	0.88	1.09	1	1.35	0.28	0.52	0.3
ENSMUSG00000022894	Adamts5	0.453	0.0177622	0.35	0.55	0.29	0.57	0.07	0.16	0.24
ENSMUSG00000018554	Ybx2	0.497	0.0181737	10.04	13.34	4.39	12.04	2.11	6	5.34
ENSMUSG00000049154	Fam183b	2.138	0.0195302	5.03	4.79	4.85	3.33	8.46	6.25	8.53
ENSMUSG00000069792	Wfdc17	2.254	0.0195883	5.23	3.94	8.1	5.69	8.11	9.76	13.74
ENSMUSG00000019876	Pkib	2.099	0.019589	1.52	1.23	1.01	3.91	1.55	2.64	3.29
ENSMUSG00000096594	Igkv8-19	2.157	0.0196012	24.14	38.05	49.17	35.9	94.94	39.27	60.15
ENSMUSG00000003545	Fosb	2.089	0.0196378	1.08	1.31	1.39	3.38	3.16	3.74	2.06
ENSMUSG00000079884	Gm10698	0.002	0.0199789	8.91	0	6.84	28.89	0	0	0
ENSMUSG00000083596	Rpl21-ps15	2.264	0.020022	28.21	7.69	27.25	38.13	50.9	51.41	36.94
ENSMUSG00000095571	Ighv5-17	0.353	0.0209347	84.43	66.33	16.13	20.77	14.88	13.4	12.09
ENSMUSG00000029361	Nos1	0.354	0.02095	0.28	0.65	0.09	0.56	0.08	0.13	0.1
ENSMUSG00000037913	Tmem156	2.651	0.0210977	0.62	0.49	0.4	0.63	0.56	1.25	1.44
ENSMUSG00000074415	3110039I08Rik	0.489	0.0211098	3.58	3.22	2.78	3.5	0.53	1.65	2.46
ENSMUSG00000015962	1700016C15Rik	2.741	0.0215997	4.2	1.89	9.3	3.19	6.54	16.47	9.8
ENSMUSG00000033847	Pla2g4c	2.076	0.0223751	3.31	1.2	1.16	1.82	3.02	2.67	3.5
ENSMUSG00000076512	Igkv9-123	4.961	0.0232353	2.14	2.74	2.46	8	35.73	4.28	4.4
ENSMUSG00000024330	Col11a2	0.48	0.0232806	0.67	0.88	0.97	0.91	0.13	0.24	0.19
ENSMUSG00000032690	Oas2	0.401	0.0236348	4.56	2.09	1.42	1.63	0.61	0.72	1.85
ENSMUSG00000026928	Card9	0.486	0.0257361	7	17.48	5.01	12.41	2.2	2.99	4.71
ENSMUSG00000098140	Gm26938	0.337	0.0258671	4.78	5.33	1.83	2.8	0.95	1.83	0.24
ENSMUSG00000056648	Hoxb8	0.409	0.0259201	2.08	8.82	2.09	5.57	1.31	1.55	2.5
ENSMUSG00000100220	Gm29331	0.466	0.0259249	8.68	8.52	10.84	6.13	3.01	4.27	2.55
ENSMUSG00000066170	E230001N04Rik	2.273	0.0264447	0.47	0.69	0.43	0.32	0.72	1.01	0.9
ENSMUSG00000036766	Dner	0.394	0.0271888	0.39	0.99	0.28	0.9	0.14	0.16	0.2
ENSMUSG00000047757	Fancb	2.004	0.0276253	0.76	0.35	0.61	0.68	0.77	1.11	1.02
ENSMUSG00000074521	Gm14327	2.628	0.0277443	0.97	0.4	0.98	0.89	14.43	1.18	2.77
ENSMUSG00000032269	Htr3a	0.456	0.0278339	1.67	3.65	1.02	2.56	0.94	0.82	0.64
ENSMUSG00000000204	Slfn4	0.497	0.0283056	4.8	2.55	2.24	2.56	0.64	1.45	1.48
ENSMUSG00000046229	Scand1	2.163	0.0288296	14.08	38.22	22.33	13.41	57.67	28.78	26.59
ENSMUSG00000038453	Srcin1	0.497	0.0289979	0.29	0.41	0.32	0.4	0.12	0.16	0.13
ENSMUSG00000040136	Abcc8	0.422	0.0293169	0.63	1.07	0.41	1.68	0.21	0.43	0.51
ENSMUSG00000034833	Tespa1	2.359	0.0297954	1.31	7.38	5.82	4.41	1.4	5.08	19.22
ENSMUSG00000028362	Tnfsf8	2.311	0.0304348	0.34	0.29	0.53	0.52	0.4	0.71	1.23
ENSMUSG00000041608	Entpd3	0.427	0.0304379	0.54	0.78	0.4	0.53	0.16	0.2	0.27
ENSMUSG00000025058	5430427O19Rik	2.729	0.0307026	0.15	0.24	0.19	0.15	0.18	0.38	0.63
ENSMUSG00000052821	Cysltr1	2.121	0.031208	0.73	0.95	0.45	0.93	0.88	1.43	2.86
ENSMUSG00000029121	Crmp1	0.449	0.031216	0.87	1.31	0.46	0.97	0.34	0.37	0.22
ENSMUSG00000097590	Gm26675	3.338	0.032277	0.17	0.12	0.78	0.67	1.32	1.46	0.8
ENSMUSG00000035964	Tmem59l	0.401	0.0323289	0.96	1.62	0.84	1.93	0.43	0.59	0.25
ENSMUSG00000100150	Gm19585	2.566	0.0343713	1.11	0.69	0.89	1.65	1.35	1.59	3.64
ENSMUSG00000037341	Slc9a7	2.722	0.0353586	0.83	0.35	0.43	0.83	0.47	0.79	1.93
ENSMUSG00000021750	Fam107a	2.296	0.038538	0.36	0.47	0.28	0.56	1.01	0.86	0.32
ENSMUSG00000024774	Ankrd22	2.127	0.038846	0.93	1.01	0.72	0.86	1.41	1.05	0.61
ENSMUSG00000016346	Kcnq2	0.457	0.0388949	0.46	0.71	0.36	0.57	0.23	0.21	0.06
ENSMUSG00000026587	Astn1	0.492	0.0394554	0.42	0.36	0.22	0.42	0.11	0.14	0.1
ENSMUSG00000054423	Cadps	0.482	0.0407555	0.62	1.39	0.73	0.96	0.18	0.42	0.35
ENSMUSG00000069072	Slc7a14	0.425	0.0409024	0.29	0.41	0.11	0.34	0.05	0.13	0.11
ENSMUSG00000031089	Slc6a14	0.03	0.0410728	2.78	5.72	0.04	8.55	0.01	0	0.27
ENSMUSG00000101625	Gm29371	2.512	0.0411311	0.12	0.29	0.37	0.12	0.31	0.41	0.65
ENSMUSG00000095210	Ighv5-9-1	0.416	0.0414283	15.95	15.06	7.47	12.13	3.51	7.04	2.37
ENSMUSG00000029321	Slc10a6	2.201	0.0418738	0.4	0.53	1.23	1.27	1.35	1.51	1.68
ENSMUSG00000025936	Gm4956	2.375	0.0455855	1.4	0.86	1.01	0.84	1.35	1.79	2.63
ENSMUSG00000045362	Tnfrsf26	2.184	0.0459587	0.2	0.29	0.32	0.44	0.44	0.43	0.72
ENSMUSG00000041046	Ramp3	2.017	0.0459587	1.36	1.18	2.53	1.76	2.71	2.21	3.36
ENSMUSG00000066363	Serpina3f	2.01	0.0462752	0.45	0.45	0.6	0.87	0.97	0.8	0.95
ENSMUSG00000025270	Alas2	2.3	0.0463057	0.33	1.48	0.97	1.59	2.36	1.32	2.38
ENSMUSG00000013653	1810065E05Rik	0.341	0.0465997	39.52	119.85	25.7	118.91	17.05	15.75	26.03
ENSMUSG00000110279	Gm45552	2.1	0.0475488	1.6	1.34	0.94	0.92	0.95	1.55	2.36
ENSMUSG00000023945	Slc5a7	0.439	0.0475588	0.23	0.57	0.26	0.65	0.14	0.18	0.14
ENSMUSG00000027313	Chac1	0.43	0.0498665	0.96	2.1	3.06	2.79	0.99	0.42	0.86
